# Supplementary material
Source: publisher figshare collection journal article supplement (https://sage.figshare.com/ndownloader/files/22692674)
Supplement: Supplementary file 1 [file 22692674]

**Supplementary Figure 2.** On-natalizumab disease activity during the first 2 years of analysis in each patient subset, shown as cumulative probability of (a) relapse, (b) 24-week–confirmed disability worsening, and (c) 24-week–confirmed disability improvement.

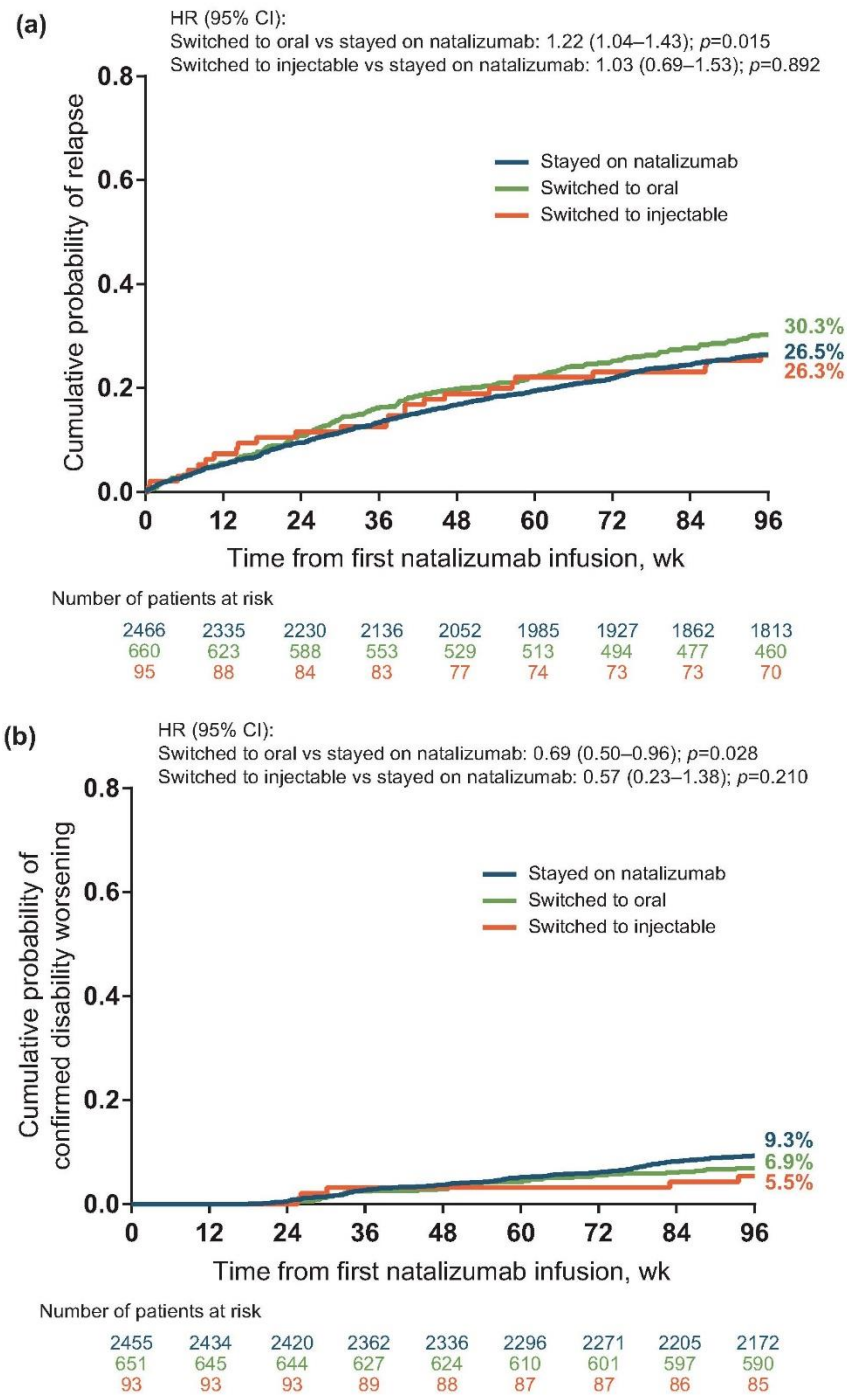

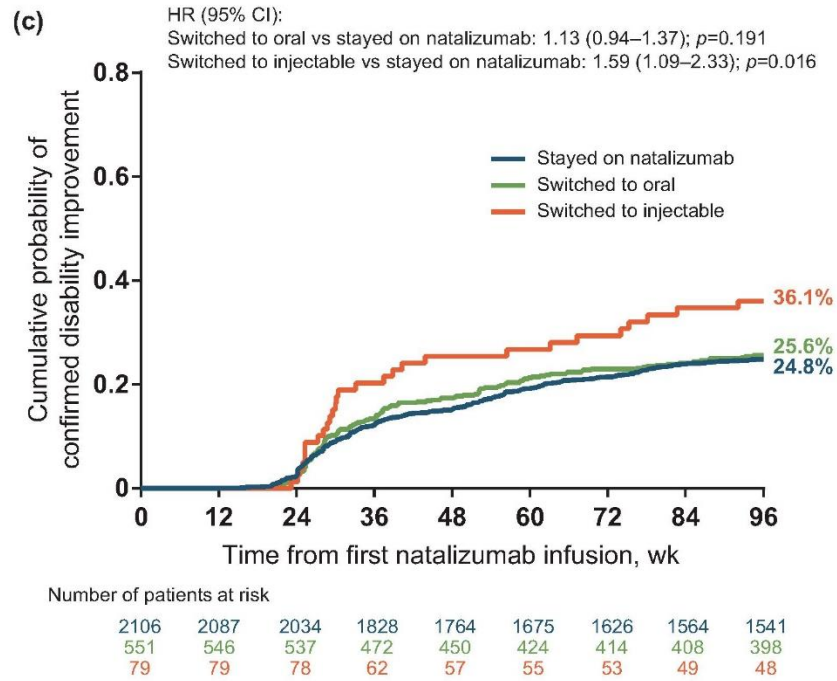

CI: confidence interval; HR: hazard ratio.
